# Supplementary material for: JMJD8 is a positive regulator of TNF-induced NF-κB signaling
Source: PubMed Central journal article supplement (PMC5037431; doi:10.1038/srep34125), 2016-09-27
Supplement: srep34125-s1.pdf [file srep34125-s1.pdf]

## Supplementary Materials

JMJD8 is a positive regulator of TNF-induced NF- $\kappa$ B signaling.

Kok Siong Yeo <sup>1</sup>, Ming Cheang Tan <sup>1</sup>, Wan Ying Wong <sup>1</sup>, Sheng Wei Loh <sup>1</sup>, Yi Lyn Lam <sup>1</sup>,  
Chin Leng Tan <sup>1</sup>, Yat-Yuen Lim <sup>1,\*</sup>, Chee-Kwee Ea <sup>1,2\*</sup>

### Author information

#### Affiliations

1 Institute of Biological Sciences, Faculty of Science,

University of Malaya,

50603 Kuala Lumpur, Malaysia

2 Current address: Department of Molecular Biology,

University of Texas Southwestern Medical Center,

Dallas, TX 75390-9148, United States

\*To whom correspondence should be addressed:

yatyuen.lim@um.edu.my; Chee-Kwee.Ea@utsouthwestern.edu

Phone: 603-79677022ext2587, Fax: 603-79557727

**Supplementary Table 1:** List of primers used in qPCR assays.

| Genes                         | Primers Sequence 5' – 3' |
|-------------------------------|--------------------------|
| IL8 Forward                   | AGCTCTGTCTGGACCCCAAG     |
| IL8 Reverse                   | GAATTCTCAGCCCTCTTCAAAAAC |
| TNF $\alpha$ Forward          | GCCCAGGCAGTCAGATCATCT    |
| TNF $\alpha$ Reverse          | TTGAGGGTTTGCTACAACATGG   |
| I $\kappa$ B $\alpha$ Forward | CTCCGAGACTTTCGAGGAAATAC  |
| I $\kappa$ B $\alpha$ Reverse | GCCATTGTAGTTGGTAGCCTTCA  |
| CCL5 Forward                  | CCCAGCAGTCGTCTTTGTCA     |
| CCL5 Reverse                  | TCCCGAACCCATTTCTTCTCT    |
| IFN $\beta$ Forward           | ACTGCCTCAAGGACAGGATG     |
| IFN $\beta$ Reverse           | AGCCAGGAGGTTCTCAACAA     |
| JMJD8 Forward                 | GACAGGTTGCTGGCTTCGTT     |
| JMJD8 Reverse                 | AGGGCAAGTCCACTTTGTGGTA   |
| SDHA Forward                  | TGGGAACAAGAGGGCATCTG     |
| SDHA Reverse                  | CCACCACTGCATCAAATTCATG   |

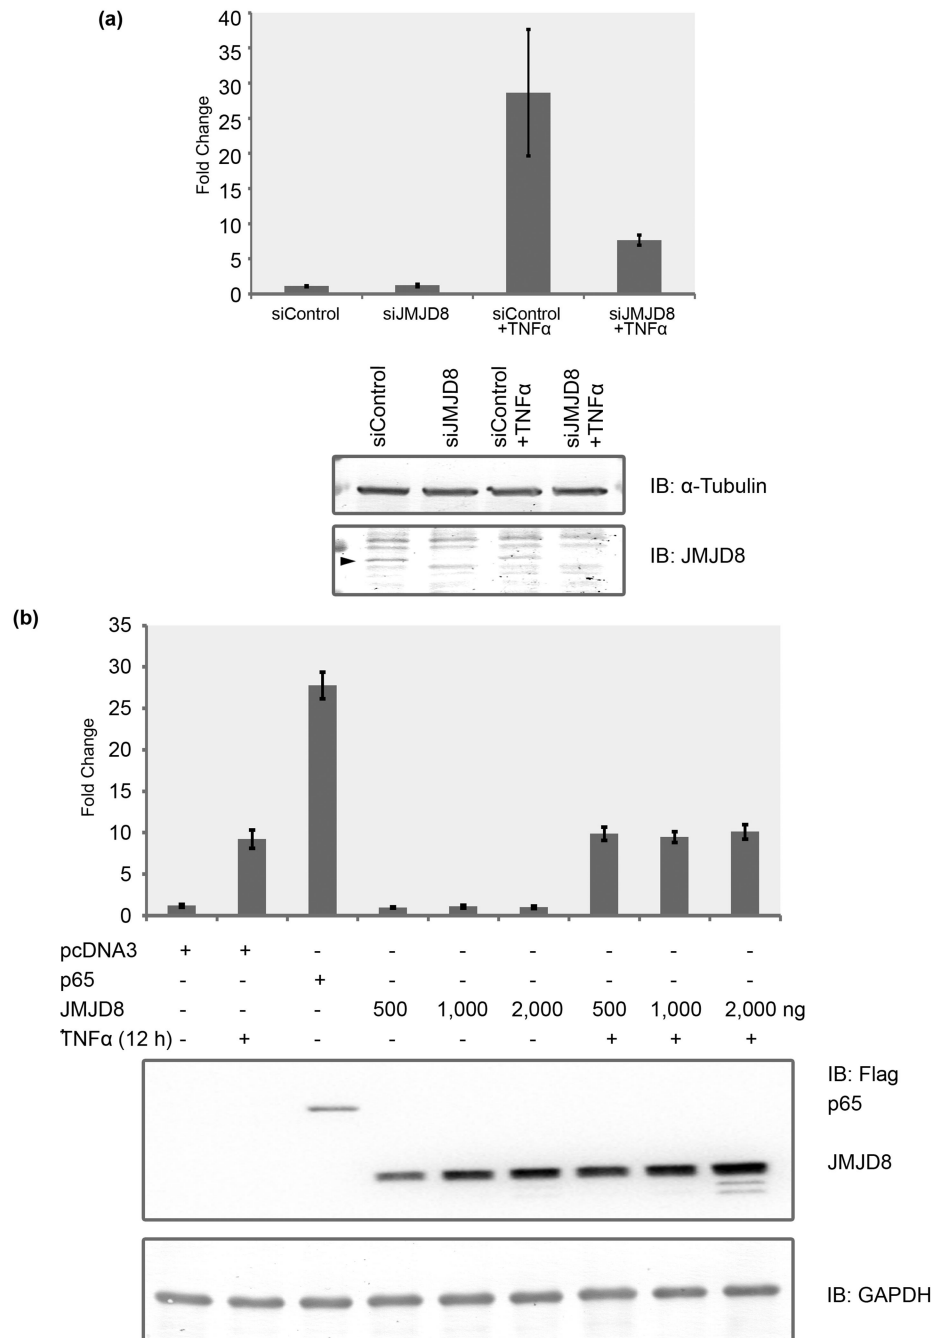

**Supplementary Figure S1: JMJD8 is required for TNF-induced NF- $\kappa$ B activity.** (a) Control and JMJD8 knockdown 293T-Luc cells were treated with 10 ng/ml of TNF $\alpha$  for 12 hours. Total cell lysates were prepared and luciferase activity was quantified with TECAN M200 microplate reader. (b) 293T-luc cells were transiently transfected with different construct as indicated and were treated with TNF $\alpha$  for 12 hours. Total cell lysates were prepared and luciferase activity was quantified with TECAN M200 microplate reader. The transient expression of ectopic JMJD8 was verified by immunoblotting with the indicated antibodies. Data represent means  $\pm$  SD. (n = 4).

(a) HONE1

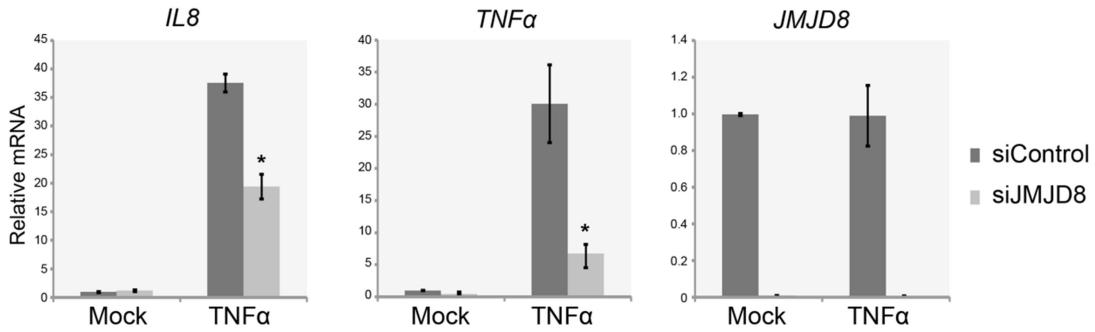

(b) HaCat

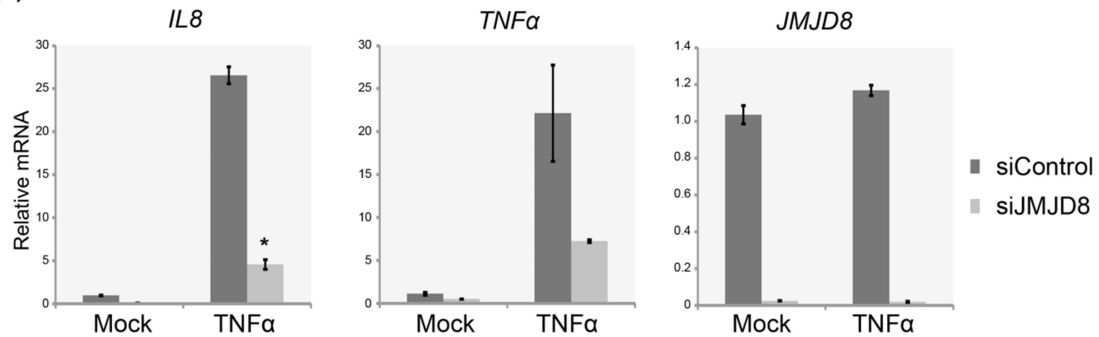

(c) U2OS

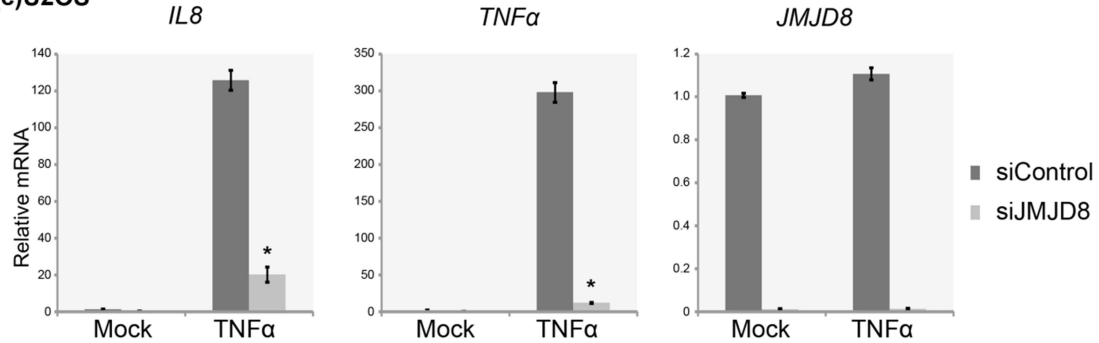

**Supplementary Figure S2: JMJD8 regulates TNF-induced NF-κB signaling is not cell-type specific.** (a) HONE1, (b) HaCat and (c) U2OS cells transfected with control and JMJD8 siRNA oligos were treated with or without 10 ng/ml of TNFα for 2 hours, the expression of *TNFα* and *IL8* were measured by RT-qPCR. (n = 4). Data represent means ± SD. (\*p > 0.05).

(a)

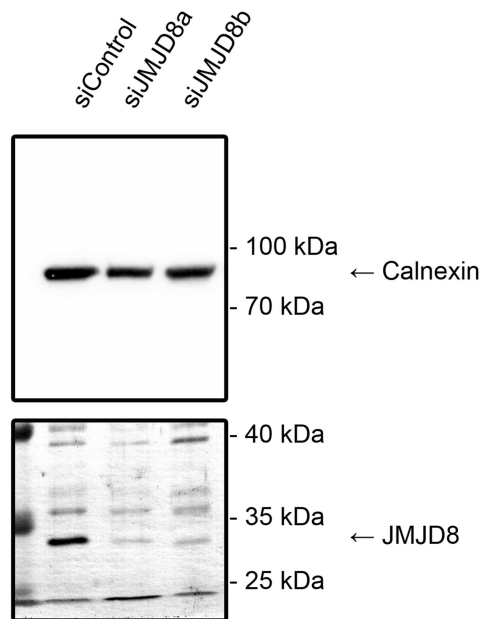

(b)

|              |   |   |   |     |     |         |
|--------------|---|---|---|-----|-----|---------|
| siControl    | + | + | - | -   | -   | -       |
| siJMJD8      | - | - | + | +   | +   | +       |
| TNF $\alpha$ | - | + | + | +   | +   | +       |
| JMJD8        | - | - | - | 100 | 500 | 1,000ng |

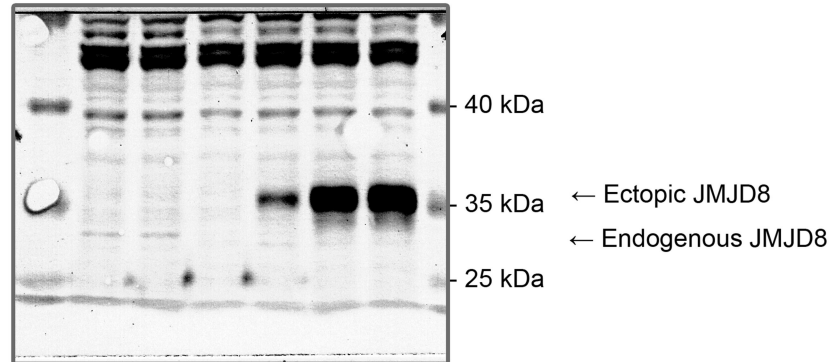

**Supplementary Figure S3:** Full-length images of immunoblots shown in Figure 1.

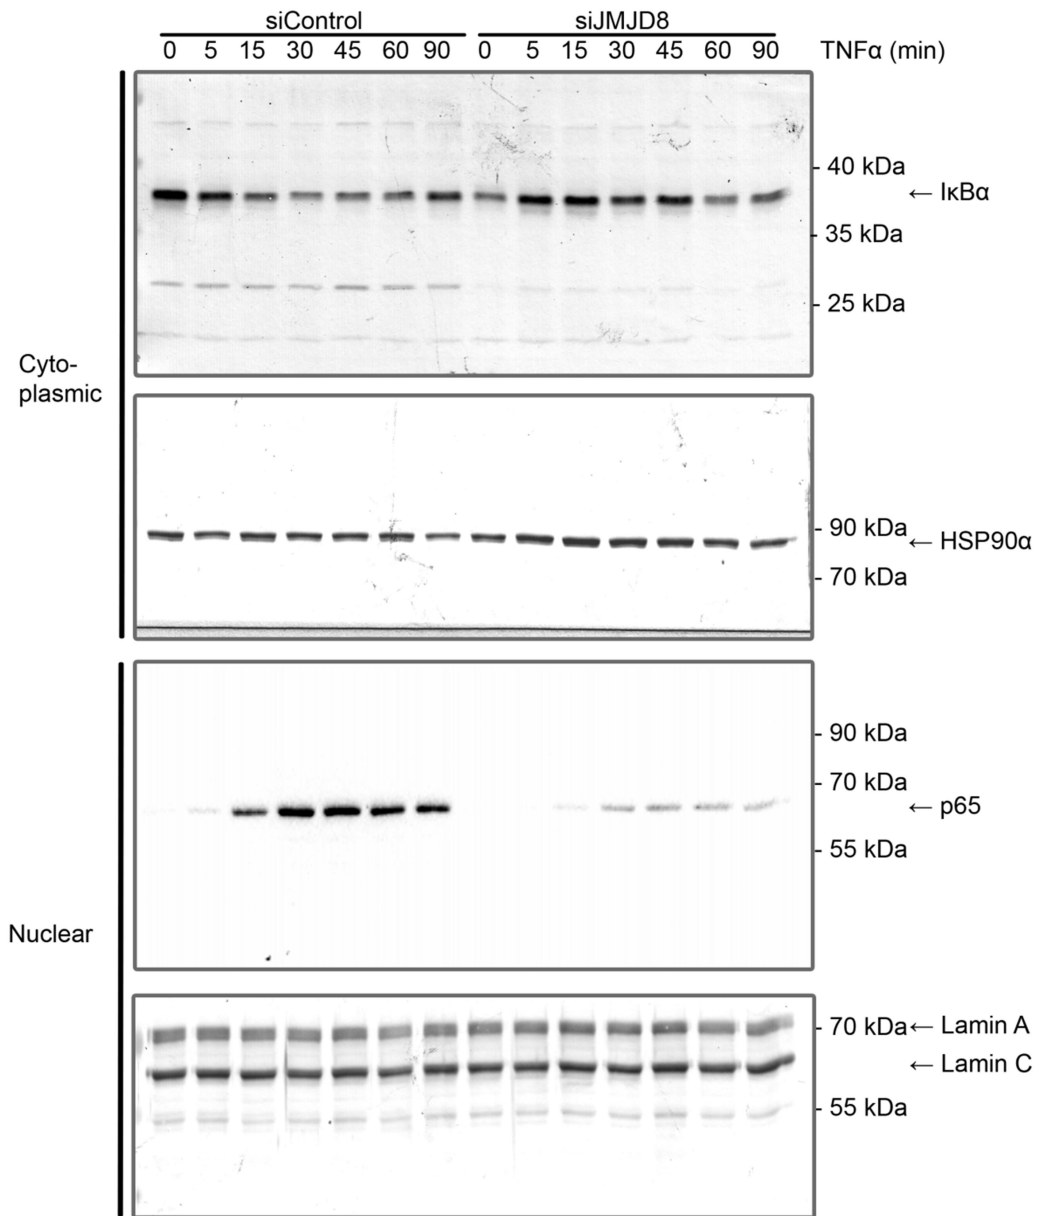

**Supplementary Figure S4:** Full-length images of immunoblots shown in Figure 2.

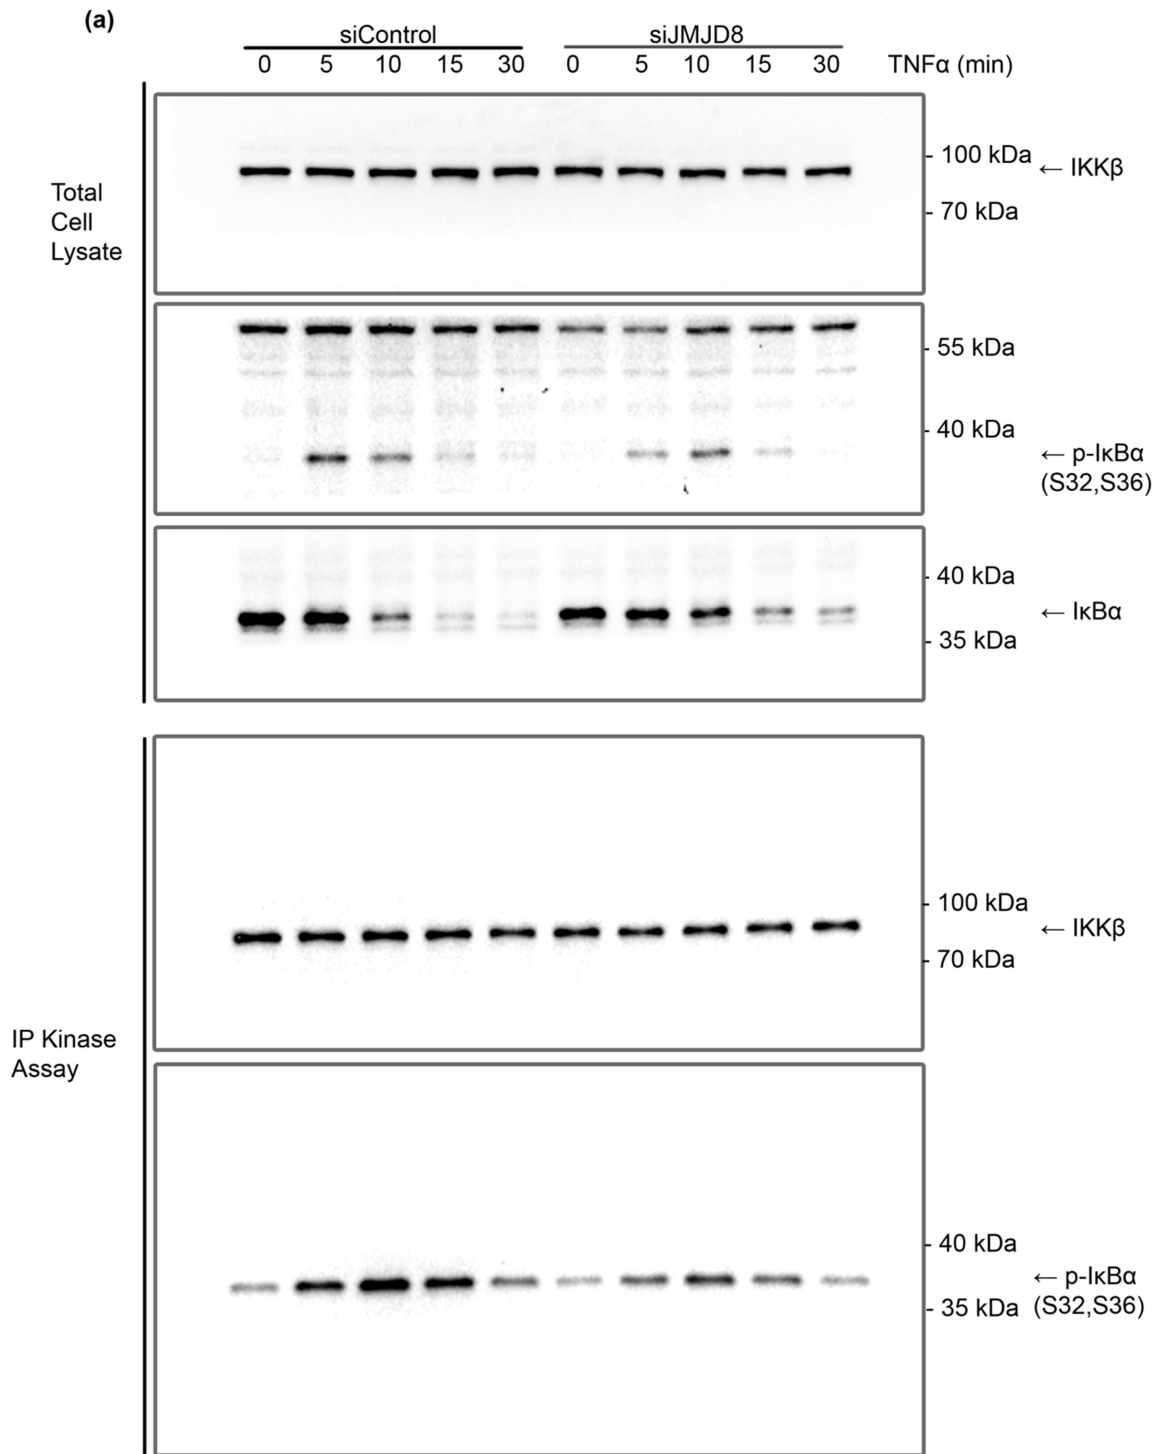

Supplementary Figure S5: Full-length images of immunoblots shown in Figure 3a.

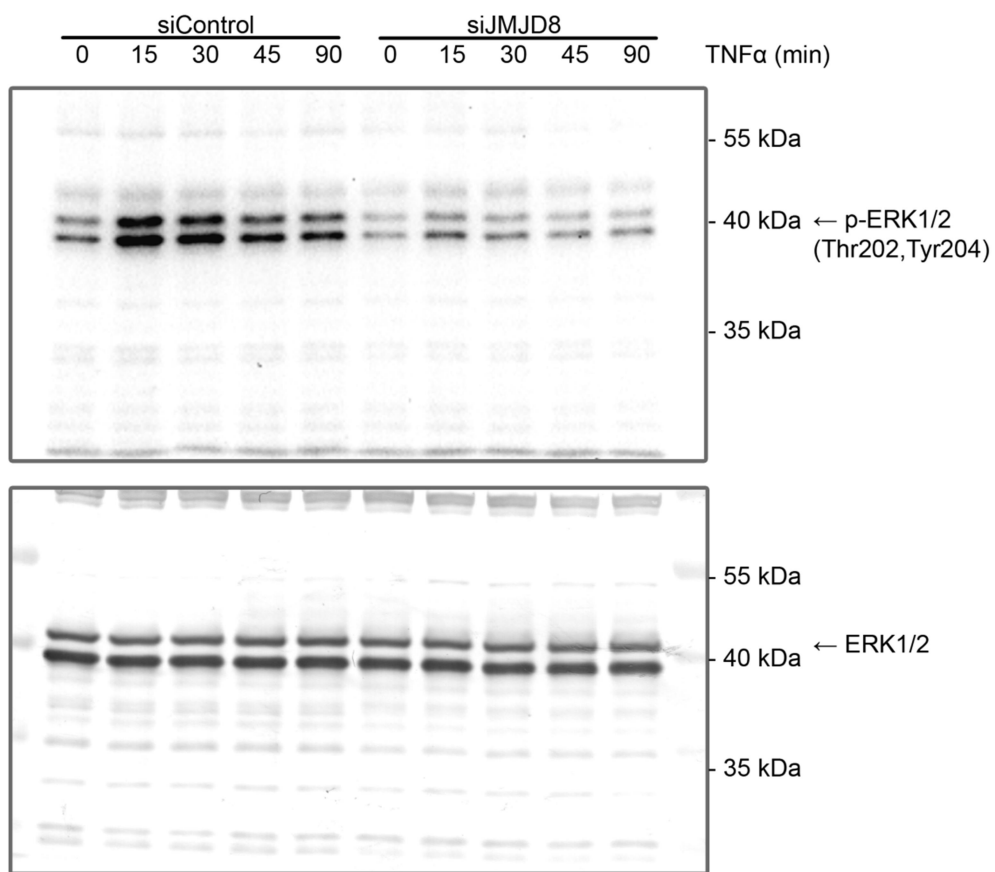

**Supplementary Figure S6:** Full-length images of immunoblots shown in Figure 3b.



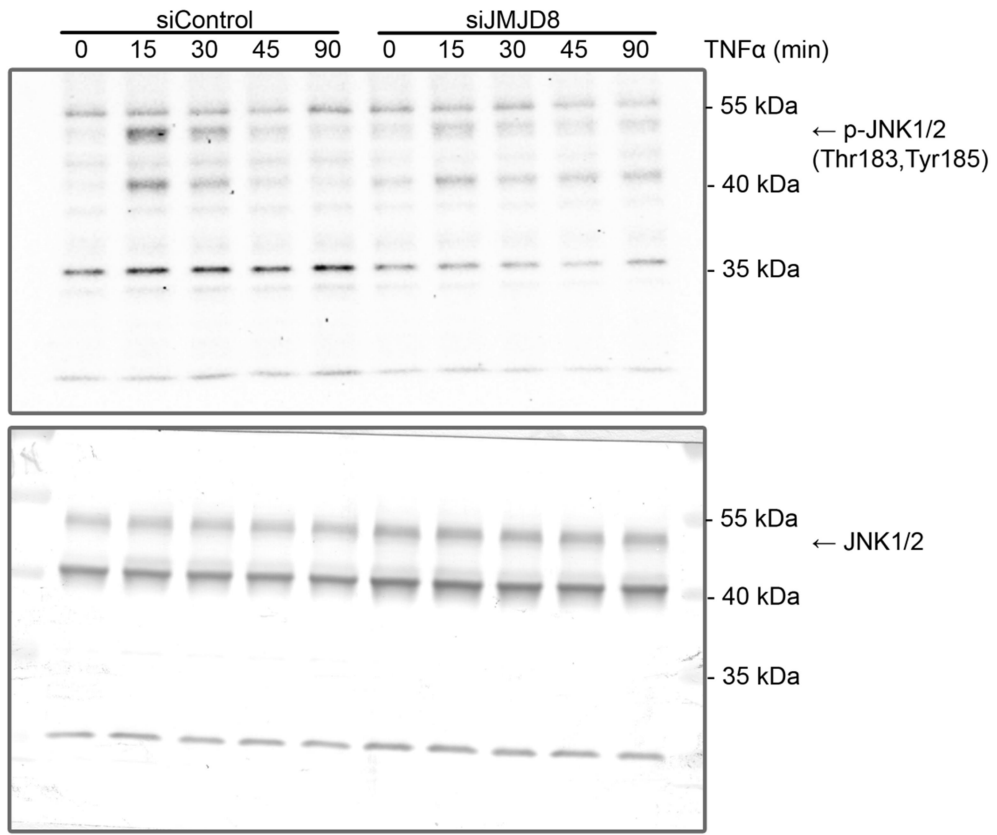

**Supplementary Figure S7:** Full-length images of immunoblots shown in Figure 3b.

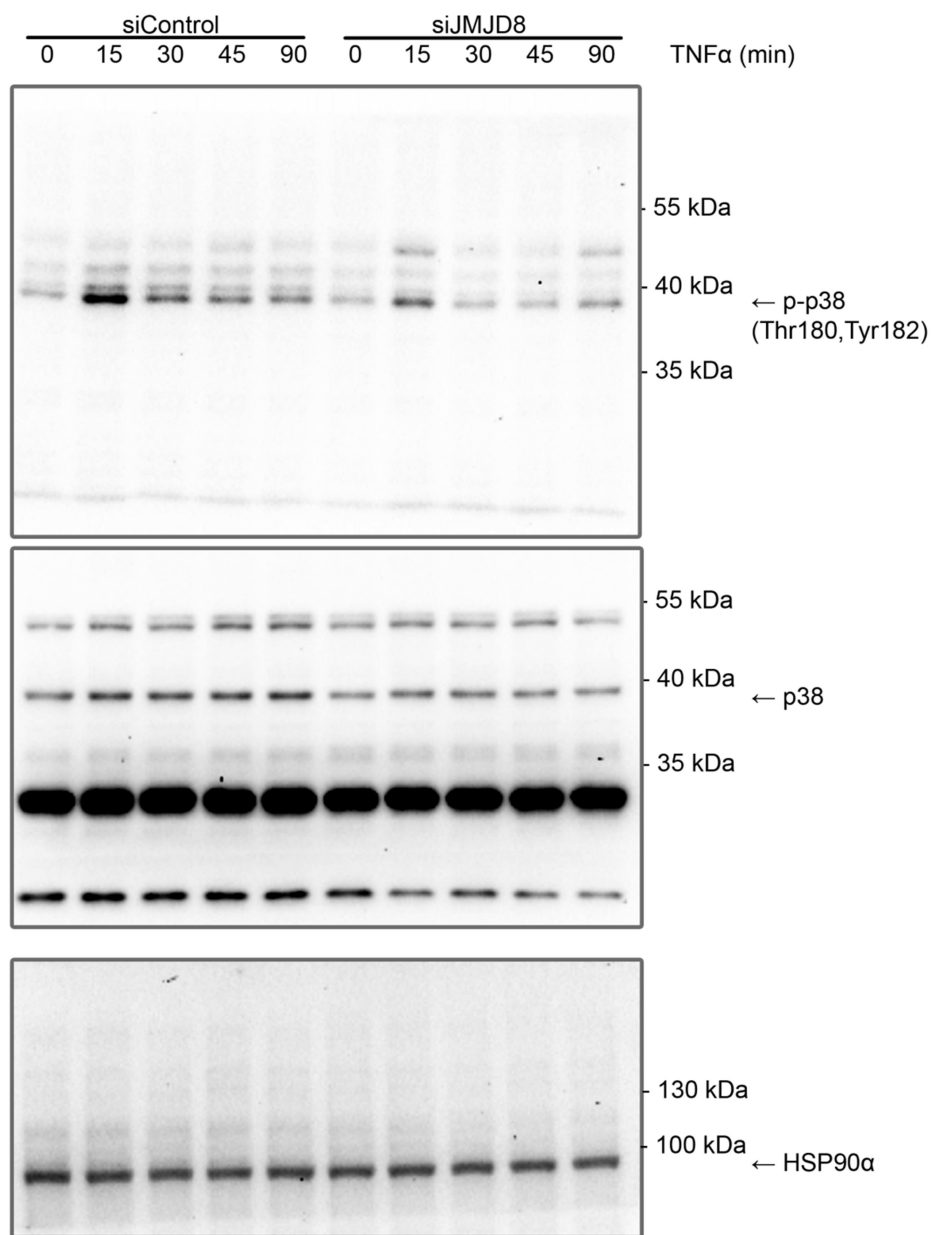

**Supplementary Figure S8:** Full-length images of immunoblots shown in Figure 3b.

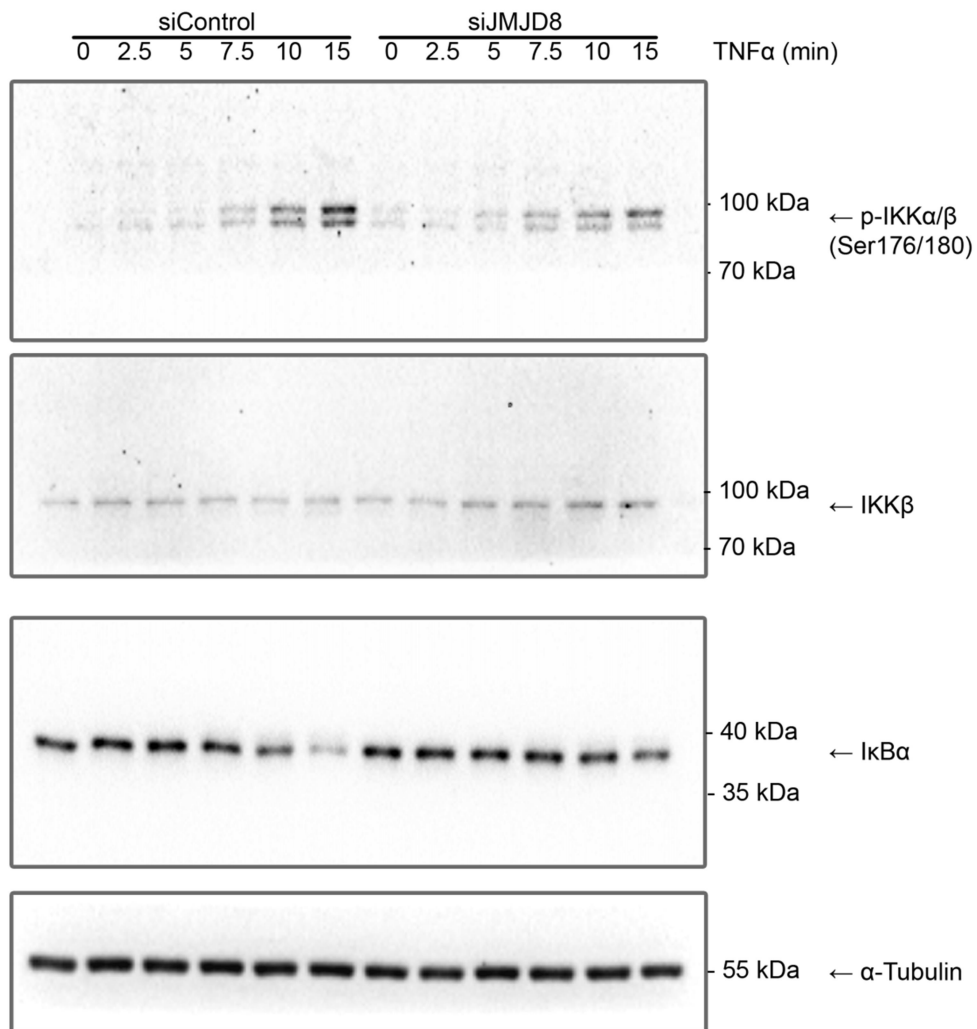

**Supplementary Figure S9:** Full-length images of immunoblots shown in Figure 4a.

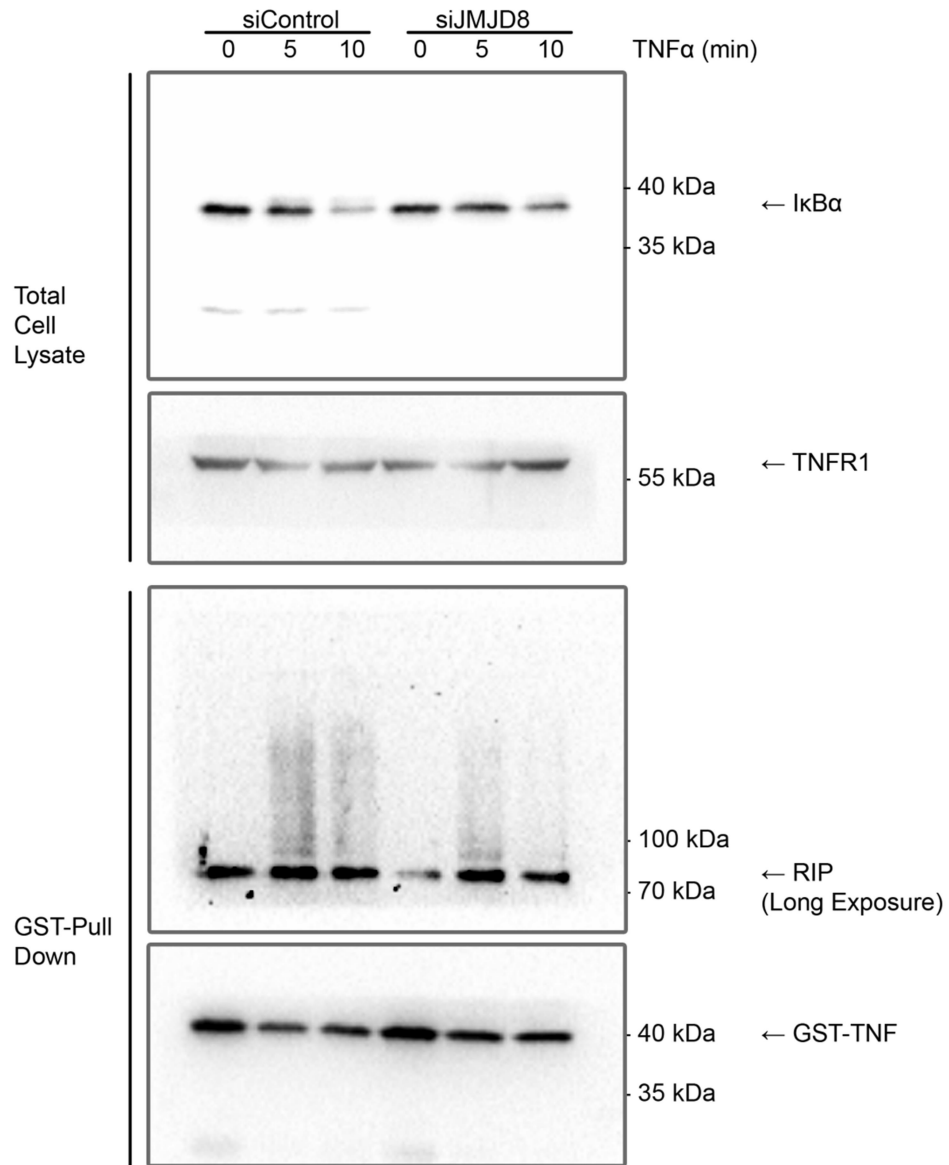

**Supplementary Figure S10:** Full-length images of immunoblots shown in Figure 4b.

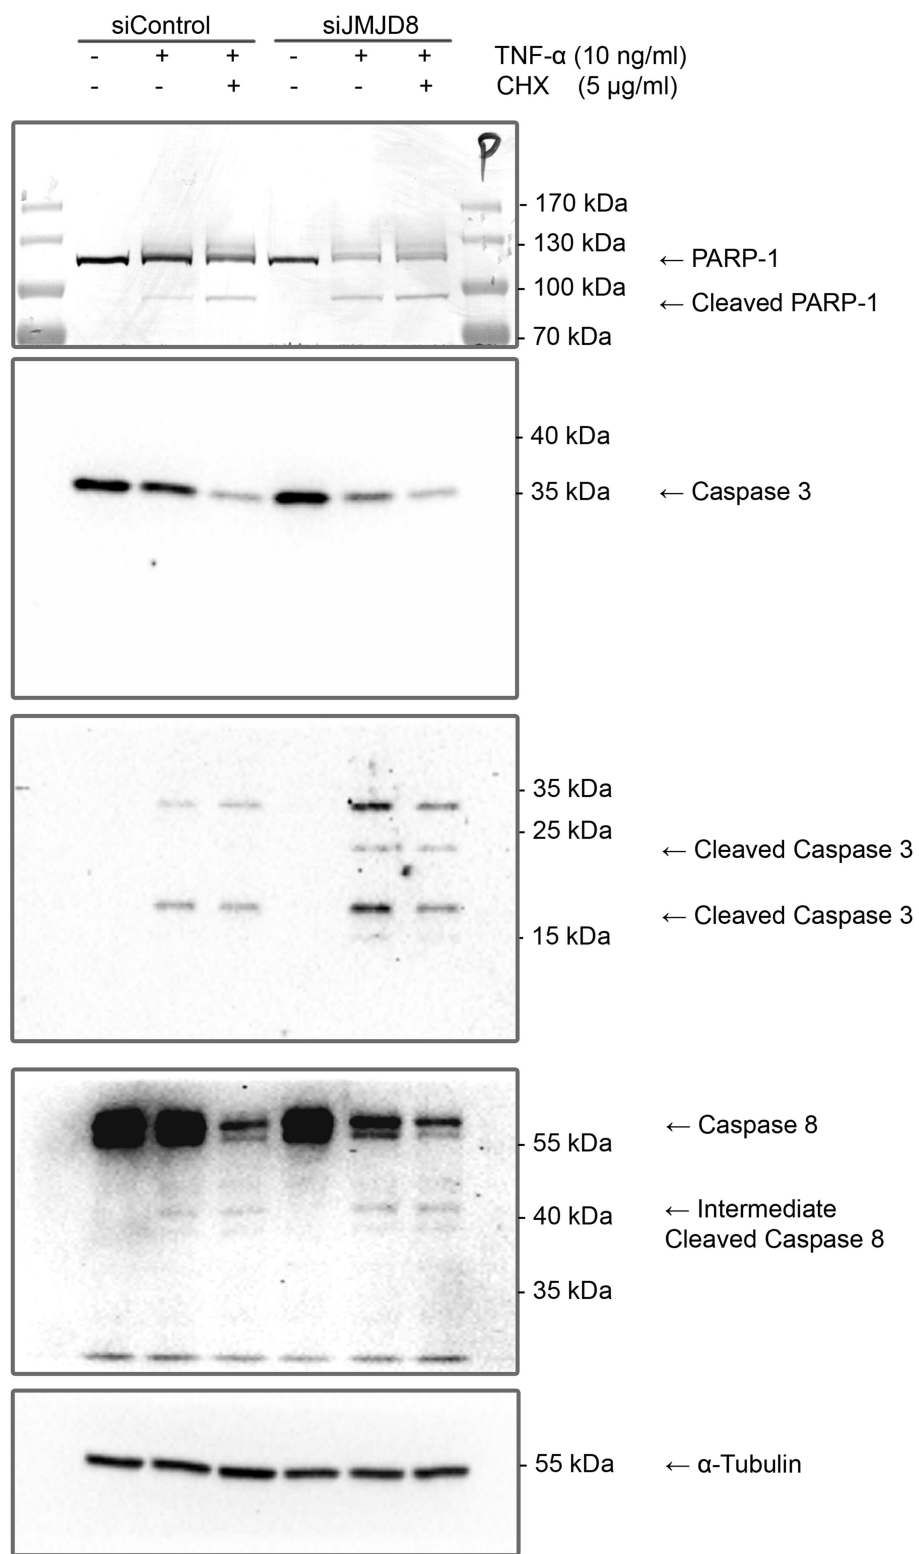

**Supplementary Figure S11:** Full-length images of immunoblots shown in Figure 5.

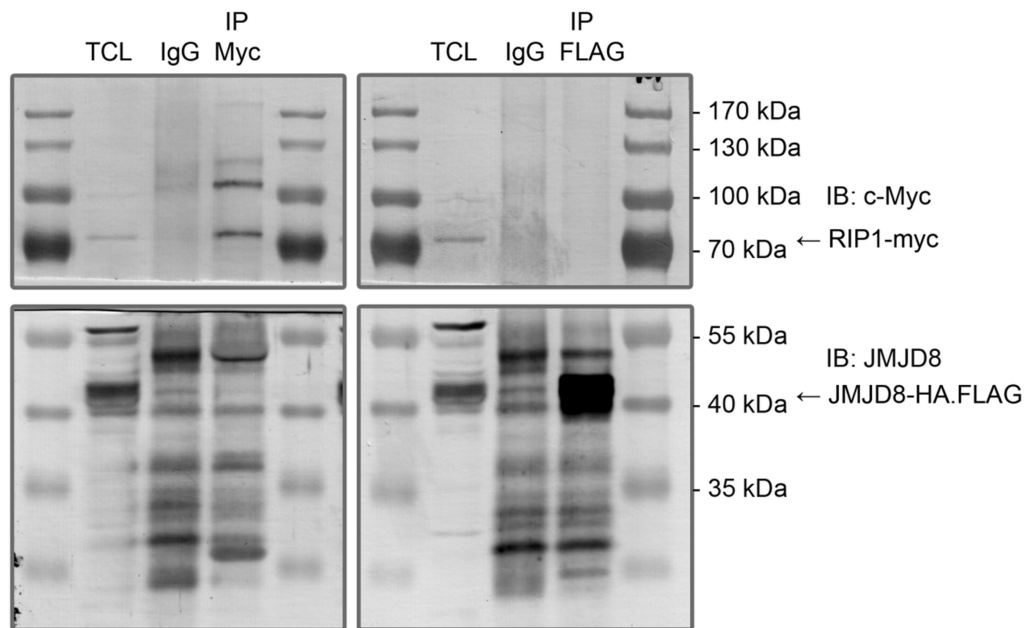

**Supplementary Figure S12: JMJD8 does not interact with RIP1.** HEK293T cells were transfected with RIP1-myc and JMJD8-HA-FLAG-expressing constructs. Total cell lysates were prepared 24 hours post-transfection and immunoprecipitated with the indicated antibodies. The bound proteins were analyzed by immunoblotting with the indicated antibodies. TCL=Total cell lysate. (n = 2).
